# Supplementary material for: In vitro inhibition of Pseudomonas aeruginosa PAO1 biofilm formation by DZ2002 through regulation of extracellular DNA and alginate production
Source: Front Cell Infect Microbiol. 2024 Jan 10;13:1333773. doi: 10.3389/fcimb.2023.1333773 (PMC10806038; doi:10.3389/fcimb.2023.1333773)
Supplement: Supplementary file 2 [file Table_2.xlsx]

## Sheet: Sheet1
			20230424（OD570）
			Control	10nM	100nM	1uM	10uM	100uM
			1.6476	1.5996	1.442	1.4424	1.2406	1.2344
			1.6765	1.6193	1.5483	1.4746	1.2584	1.2685
			1.6904	1.6492	1.5087	1.5307	1.2296	1.1664
			20230428（OD570）
			Control	10nM	100nM	1uM	10uM	100uM
			1.4377	1.3271	1.2754	1.2232	1.156	1.1207
			1.3993	1.3189	1.2734	1.231	1.1792	1.1247
			1.3942	1.288	1.2747	1.2209	1.1176	1.1189
			20230429（OD570）
			Control	10nM	100nM	1uM	10uM	100uM
			1.6403	1.5251	1.5721	1.4511	1.3214	1.2166
			1.6234	1.6481	1.5578	1.4027	1.3478	1.2732
			1.601	1.6185	1.5795	1.435	1.3113	1.289
		Statistical analysis
			Number of families	1
			Number of comparisons per family	15
			Alpha	0.05
			Tukey's multiple comparisons test	Mean Diff.	95% CI of diff.	Significant?	Summary
			Control vs. 0.01uM	0.0574	-0.1068 to 0.2216	No	ns
			Control vs. 0.1uM	0.1198	-0.04441 to 0.2841	No	ns
			Control vs. 1uM	0.1888	0.02452 to 0.3530	Yes	*
			Control vs. 10uM	0.3276	0.1634 to 0.4918	Yes	****
			Control vs. 100uM	0.3664	0.2022 to 0.5307	Yes	****
			0.01uM vs. 0.1uM	0.06243	-0.1018 to 0.2267	No	ns
			0.01uM vs. 1uM	0.1314	-0.03288 to 0.2956	No	ns
			0.01uM vs. 10uM	0.2702	0.1060 to 0.4344	Yes	***
			0.01uM vs. 100uM	0.309	0.1448 to 0.4733	Yes	****
			0.1uM vs. 1uM	0.06892	-0.09532 to 0.2332	No	ns
			0.1uM vs. 10uM	0.2078	0.04354 to 0.3720	Yes	**
			0.1uM vs. 100uM	0.2466	0.08237 to 0.4108	Yes	***
			1uM vs. 10uM	0.1389	-0.02538 to 0.3031	No	ns
			1uM vs. 100uM	0.1777	0.01345 to 0.3419	Yes	*
			10uM vs. 100uM	0.03883	-0.1254 to 0.2031	No	ns
			Test details	Mean 1	Mean 2	Mean Diff.	SE of diff.	n1	n2	q	DF
			Control vs. 0.01uM	1.568	1.51	0.0574	0.05534	9	9	1.467	48
			Control vs. 0.1uM	1.568	1.448	0.1198	0.05534	9	9	3.062	48
			Control vs. 1uM	1.568	1.379	0.1888	0.05534	9	9	4.824	48
			Control vs. 10uM	1.568	1.24	0.3276	0.05534	9	9	8.372	48
			Control vs. 100uM	1.568	1.201	0.3664	0.05534	9	9	9.365	48
			0.01uM vs. 0.1uM	1.51	1.448	0.06243	0.05534	9	9	1.596	48
			0.01uM vs. 1uM	1.51	1.379	0.1314	0.05534	9	9	3.357	48
			0.01uM vs. 10uM	1.51	1.24	0.2702	0.05534	9	9	6.905	48
			0.01uM vs. 100uM	1.51	1.201	0.309	0.05534	9	9	7.898	48
			0.1uM vs. 1uM	1.448	1.379	0.06892	0.05534	9	9	1.761	48
			0.1uM vs. 10uM	1.448	1.24	0.2078	0.05534	9	9	5.31	48
			0.1uM vs. 100uM	1.448	1.201	0.2466	0.05534	9	9	6.302	48
			1uM vs. 10uM	1.379	1.24	0.1389	0.05534	9	9	3.549	48
			1uM vs. 100uM	1.379	1.201	0.1777	0.05534	9	9	4.541	48
			10uM vs. 100uM	1.24	1.201	0.03883	0.05534	9	9	0.9924	48
